# Supplementary material for: Dissolution and Hydrolysis of Bleached Kraft Pulp Using Ionic Liquids
Source: MDPI journal article supplement (doi:10.3390/polym11040673), 2019-04-12
Supplement: s1 [file s1]

## Supplementary Information

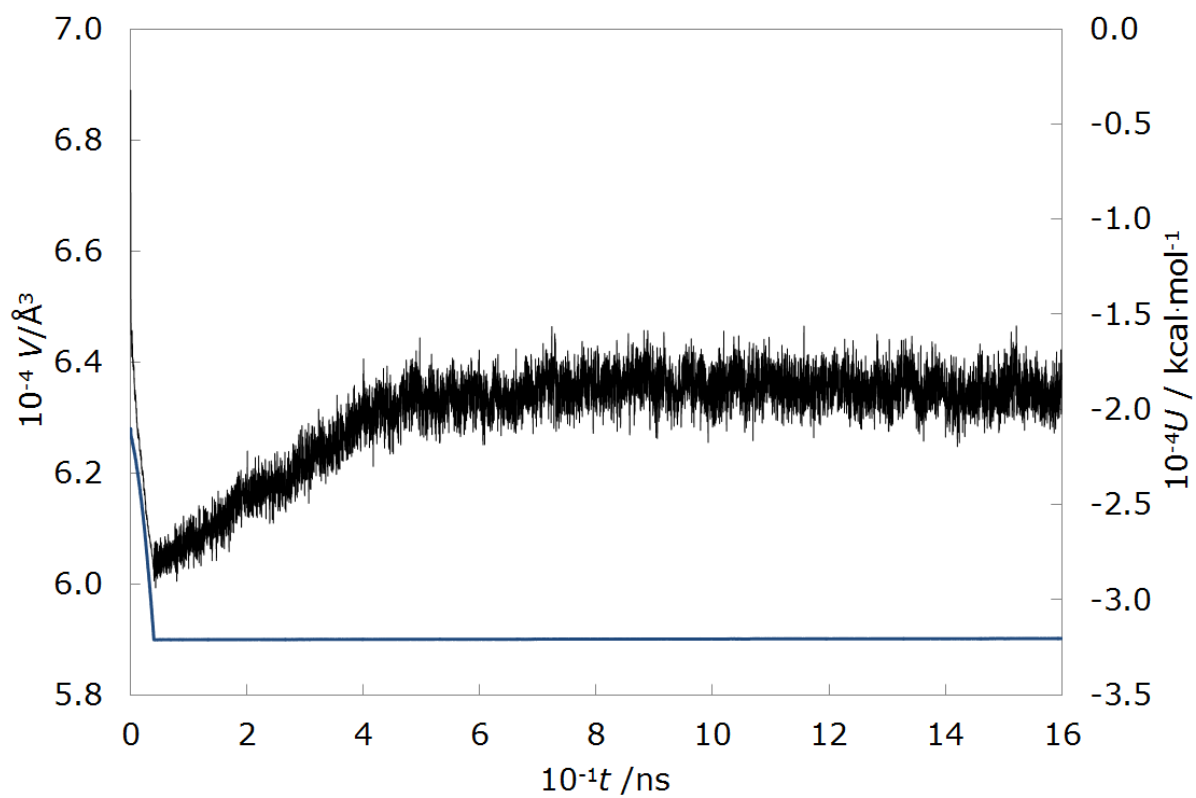

Figure. S1. Total energy (U) (blue line) and total volume (V) (black line) as a function of time (t) in NPT simulation at 298.15 K.
